# Supplementary material for: Genome sequence comparisons of serial multi-drug-resistant Mycobacterium tuberculosis isolates over 21 years of infection in a single patient
Source: PubMed Central journal article supplement (PMC5320678; doi:10.1099/mgen.0.000037), 2015-11-26
Supplement: mgen-01-37-s001.pdf [file mgen-01-37-s001.pdf]

Supplementary Table 1: Mutations detected among the seven isolates over 20 years compared to 41

| Locus_tag | Gene | Position   | Change type  | SNP call |          |            |            |           |           |             |           | Observed read coverage and composition across each position |             |                |             |            |           |            | Comments   |                                                                                     |                                                                              |
|-----------|------|------------|--------------|----------|----------|------------|------------|-----------|-----------|-------------|-----------|-------------------------------------------------------------|-------------|----------------|-------------|------------|-----------|------------|------------|-------------------------------------------------------------------------------------|------------------------------------------------------------------------------|
|           |      |            |              | 41-1991  | 323-1992 | 682-1993   | 1087-1995  | 2573-2002 | 2855-2003 | 4891-2010   | 5288-2011 | 41-1991                                                     | 323-1992    | 682-1993       | 1087-1995   | 2573-2002  | 2855-2003 | 4891-2010  |            | 5288-2011                                                                           |                                                                              |
| Rv0486    | mshA | 576461-63  | deletion     | GCG      | -        | -          | -          | -         | -         | -           | -         | GCGx216                                                     | x130 Gx5    | -x17 Gx1       | -x27 Gx1    | -x58 Gx2   | -x16 Gx1  | -x83 Gx4   | -x13       | In-frame deletion, codon 372 of MshA, D-inositol 3-phosphate glycosyltransferase    |                                                                              |
|           |      | 755289*    | insertion    | -        | A        | -          | -          | -         | -         | -           | -         | -                                                           | x217        | Ax104 -x19     | -x25        | -x29 Ax1   | -x67      | -x18 Ax1   | -x90       |                                                                                     | -x11                                                                         |
|           |      | 755294-96* | substitution | TCG      | CGA      | TCG        | TCG        | TCG       | TCG       | TCG         | TCG       | TCG                                                         | TCGx215 Cx2 | CGAx106 TCGx19 | TCGx25      | TCGx28 Cx1 | TCGx67    | TCGx18 Cx1 | TCGx88 Cx1 |                                                                                     | TCGx11                                                                       |
| Rv1386    |      | 755302*    | deletion     | T        | -        | T          | T          | T         | T         | T           | T         | Tx218 Ax3                                                   | -x105 Tx22  | Tx26           | Tx27 -x1    | Tx72       | Tx14 -x1  | Tx88 -x5   | Tx11       | Intergenic, -9 'A' substitution within possible RBS for PE family protein, PE15     |                                                                              |
|           |      | 1561455    | substitution | G        | G        | G          | G          | G         | G         | G           | A         | Gx161                                                       | Gx77        | Gx19           | Gx18        | Gx77       | Gx12      | Gx121      | Ax11       |                                                                                     |                                                                              |
| Rv1819c   | bacA | 2063079    | insertion    | -        | -        | -          | -          | <b>C</b>  | <b>C</b>  | <b>C</b>    | <b>C</b>  | -x173                                                       | -x135       | -x38           | -x37 Cx2    | Cx101 -x2  | Cx33      | Cx125 -x5  | Cx10       | Frame shift, 'G' insertion in bacA, vitamin B12 transport ATP-binding protein, BacA |                                                                              |
| Rv2043c   | pncA | 2289151    | substitution | T        | <b>A</b> | <b>A</b>   | <b>A</b>   | <b>A</b>  | <b>A</b>  | <b>A</b>    | <b>A</b>  | Tx218 Ax1                                                   | Ax137       | Ax37           | Ax51        | Ax132      | Ax37      | Ax147      | Ax12       | Amino acid substitution in pyrazinamidase/nicotinamidase PncA (I31F)                |                                                                              |
|           |      | 2368904    | insertion    | -        | -        | -          | CGG/-      | -         | -         | -           | -         | -x275                                                       | -x252       | -x28 CGGx8     | CGGx51 -x15 | -x218      | -x32      | -x177      | -x1        | Intergenic, non-persisting mutation                                                 |                                                                              |
|           |      | 2584951    | substitution | C        | C        | C          | C          | C         | C         | C           | G         | Cx237                                                       | Cx187       | Cx38           | Cx36        | Cx80 Gx1   | Cx23      | Cx144 Ax1  | Gx20       | Intergenic                                                                          |                                                                              |
| Rv2326c   |      | 2597976    | insertion    | -        | -        | -          | -          | -         | <b>G</b>  | <b>-/G</b>  | <b>G</b>  | -x166                                                       | -x97        | -x36           | -x32        | -x80 Gx9   | Gx13      | -x46 Gx37  | Gx9 -x1    | Frame shift, 'C' insertion, ABC transporter ATP-binding protein                     |                                                                              |
|           |      | 2610704    | substitution | G        | A        | G          | G          | G         | G         | G           | G         | Gx239                                                       | Ax222 Gx70  | Gx71           | Gx68        | Gx201      | Gx63      | Gx174 Ax1  | Gx12       | Intergenic, non-persisting mutation                                                 |                                                                              |
| Rv2428    | ahpC | 2726149    | substitution | T        | T        | T          | T          | T         | <b>C</b>  | <b>T/C</b>  | <b>C</b>  | Tx279                                                       | Tx218       | Tx59           | Tx82        | Tx128 Cx11 | Cx44      | Tx87 Cx81  | Cx18       | Intergenic, ahpC -44 T->C substitution in oxyR-ahpC region                          |                                                                              |
| Rv3033    |      | 3393491    | substitution | A        | A        | <b>A/G</b> | <b>A/G</b> | <b>G</b>  | <b>G</b>  | <b>G</b>    | <b>G</b>  | Ax180 Gx2                                                   | Ax123 Cx1   | Ax23 Gx8       | Ax36 Gx3    | Gx121 Tx1  | Gx27 Ax1  | Gx111      | Gx16       | Amino acid substitution in hypothetical protein (S38G)                              |                                                                              |
| Rv3200c   |      | 3573526    | substitution | C        | C        | C/T        | T          | C         | C         | C           | C         | Cx163                                                       | Cx109       | Cx24 Tx10      | Tx28 Cx5    | Cx79       | Cx27      | Cx102      | Cx13       | Synonymous, non-persisting mutation, transmembrane cation transporter               |                                                                              |
| Rv3340    | metC | 3726078    | insertion    | -        | -        | -          | -          | -         | <b>GA</b> | <b>-/GA</b> | <b>GA</b> | -x235                                                       | -x159       | -x40           | -x44        | -x91       | Gx26      | -x84 Gx12  | Gx11       | Intergenic, metC -49 'GA' insertion, methionine biosynthesis enzyme MetC            |                                                                              |
| Rv3854    | ethA | 4327133    | deletion     | T        | T        | <b>T/-</b> | <b>T/-</b> | -         | -         | -           | -         | Tx217                                                       | Tx173       | Tx31 -x11      | Tx38 -x7    | -x136 Gx1  | -x49      | -x164      | -x10 Tx1   | Frameshift, 'A' deletion, monooxygenase EthA                                        |                                                                              |
| Rv3854    | ethA | 4327169    | substitution | T        | T/G      | T/G        | T/G        | T         | T         | T           | T         | Tx225                                                       | Tx136 Gx33  | Gx37 Tx13      | Gx33 Tx6    | Tx140 Gx1  | Tx50      | Tx164 Gx1  | Tx9        | Amino acid substitution in monooxygenase EthA (H102P)                               |                                                                              |
|           |      | 4403459    | substitution | C        | C        | C          | A/C        | C         | C         | C           | C         | Cx270                                                       | Gx240 Ax1   | Cx68 Ax1       | Ax82 Cx13   | Cx183 Ax2  | Cx54 Ax1  | Cx183      | Cx9        | Intergenic, non-persisting mutation                                                 |                                                                              |
| Rv3919c   | gidB | 4407928    | substitution | T        | T        | T          | T          | T         | T         | G           | T         | G                                                           | Tx273       | Tx211 Cx1      | Tx49        | Tx68       | Tx168     | Gx61 Tx3   | Tx225 Cx1  | Gx6                                                                                 | Amino acid substitution in rRNA small subunit methyltransferase, GidB (E92A) |

Notes: Bases highlighted in red type face and bold border indicates persisting mutation; "A/C" notation indicates ambiguous base call at that position; "-" indicates deletion; "\*" indicates cluster counted as a single mutation event
